# Supplementary material for: Sonic hedgehog signalling regulates the self‐renewal and proliferation of skin‐derived precursor cells in mice
Source: PubMed Central journal article supplement (PMC6528853; doi:10.1111/cpr.12500), 2018-08-27

(A)

P1

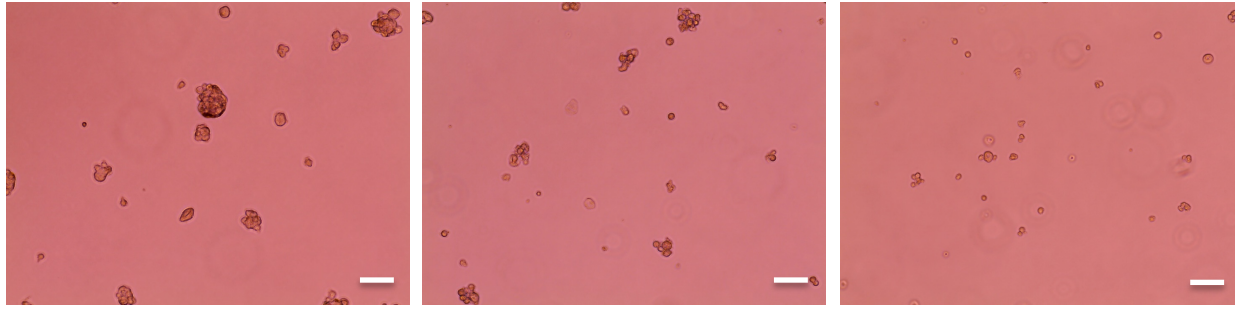

Con

GANT-61 (15 μM)

GANT-61 (20 μM)

(B)

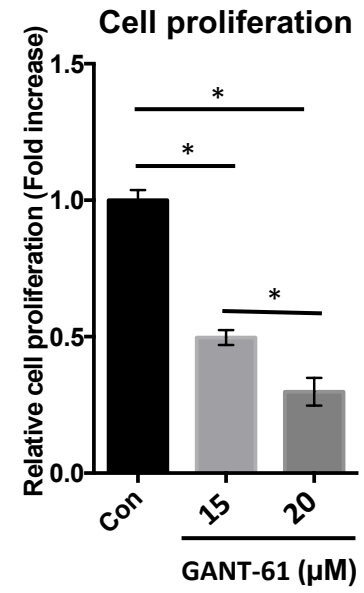

Supplement: CPR-51-na-s002.pdf [file CPR-51-na-s002.pdf]
